# Supplementary material for: Ethylene Action-Inhibition Improves Adventitious Root Induction in Adult Chestnut Tissues
Source: Preprints.org preprint supplement (doi:10.20944/preprints202312.2285.v1), 2023-12-29
Supplement: Supplementary file 1 [file supplementary]

## Sheet: Primers
Supplemental Table 1 - Nucleotide sequence of the primers used for the qPCR analysis. Gene ID of the sequences from the species used for the design of the primers is shown.
Name	Gene symbol		Primer sequence
ACC synthase (CsACS1-like)	Q. suber	LOC111986768	Forward	ACCCTTTGGGCACGGTTTTA
	C. mollisima	Cm03G01038	Reverse	TGAGATCACGGTCACATTCCA
ACC oxidase (CsACO1-like)	Q. suber	LOC112025431	Forward	TGGACTAGAGAAAGGTTACCTGA
	C. mollisima	Cm05G01871	Reverse	GCTGGAGACCACTGACCTTG
Ethylene Responsive Factor 3 (CsERF3)	Q. suber	LOC112007198	Forward	TGATGGTGATTGATCCGCAG
	C. mollisima	Cm05G02681	Reverse	CGCTGTGGCAATCTTCAGGA
Ethylene Insensitive 2 (CsEIN2)	Q. suber	LOC112036364	Forward	ACTGTTGGGAGTGAAGGAGTT
	C. mollisima	Cm11G02100	Reverse	TTTCTCTCTTGCGGCCACTC
CsPIN1	Q. suber	LOC111993333	Forward	TCTAGGAGGTCGCAAGGATT
	C. mollisima	Cm06G01339	Reverse	GAGTTCCTCCCACCAGCTC
CsIAA29	Q. suber	LOC112012600	Forward	AACTTGCCCTCGCACTTCCA
	C. mollisima	Cm01G03273	Reverse	GAATGTTTGTGGCACTCCTCC
Jumonji 30 (CsJMJ30)	Q. suber	LOC112002893	Forward	CAGCCAGGACAAAGTGGAATG
	C. mollisima	Cm07G00370	Reverse	TATGTAGGGTTGTCAGAACAGTTG
Histone Deacetylase 14 (CsHDA14)	C. mollisima	Cm06G01721	Forward	TGCCTCTACCTGGAGGATCA
			Reverse	AGCGTGTAGTATGTTCCCGT
CsRAP2.12-like 1	C. sativa	JF755969	Forward	TGTCTGAGGAGCTATCAGCTTT
			Reverse	GCAAGCATGGGAGAATAGCA
Elongation Factor 1 (CsELF-1)	Q. suber	LOC112038967	Forward	TGTGCCGTCCTCATTATTGACT
			Reverse	TCACGGGTCTGACCATCCTT
Actin 2 (CsACT-2)	Q. suber	LOC112027658	Forward	GCCCCACGAGCTGTGTTC
			Reverse	TCTGGCCCATTCCAACCA
